# Supplementary material
Source: ML conference proceedings conference paper supplement (https://openreview.net/forum?id=GGBe1uQ_g_8)
Supplement: supplementary_material [file attachment]

# Appendix

## A Problem Formulation and RKD Methods

### A.1 Problem Formulation of CIL.

In the CIL setting, a dataset  $\mathcal{D} = \{(x, y) | x \in \mathcal{X}, y \in \mathcal{Y}\}$  is split to  $T$  subsets:  $\mathcal{D} = \mathcal{D}^1 \cup \mathcal{D}^2 \cup \dots \cup \mathcal{D}^t$ , where  $\mathcal{X}$  is a set of images with labels  $\mathcal{Y}$  and the subsets have no overlapped classes, then a learning system is trained to learn each subset incrementally. At task  $t$ , we have a model  $f_{\theta, W}^{t-1}$  which has incrementally learned the old classes  $\tilde{\mathcal{C}}^{t-1} = \{\mathcal{C}^1, \mathcal{C}^2, \dots, \mathcal{C}^{t-1}\}$ , where  $\theta, W$  denote the parameters of the feature extractor and the linear layer of the network, respectively and  $\mathcal{C}^i$  denotes the classes in  $i$  subset (task  $i$ ). Now, given the new subsets  $\mathcal{D}^t$  with the new classes  $\mathcal{C}^t$ , the goal is to train a new model  $f_{\theta, W}^t$  that can perform classification on all the classes  $\tilde{\mathcal{C}}^t = \tilde{\mathcal{C}}^{t-1} \cup \mathcal{C}^t$ . In rehearsal-knowledge-distillation-based (RKD) methods, they store a small number of image exemplars of the old classes after the completion of each incremental learning task for experience replay at the future tasks. We denote  $E^t$  as the selected exemplars of the current task (the new classes) to be stored after the completion of task  $t$ . We denote  $\tilde{E}^t = \tilde{E}^{t-1} \cup E^{t-1}$ ,  $\tilde{\mathcal{D}}^t = \mathcal{D}^t \cup \tilde{E}^t$ ,  $\tilde{\mathcal{X}}^t = \{x | (x, y) \in \tilde{\mathcal{D}}^t\}$ ,  $\tilde{\mathcal{Y}}^t = \{y | (x, y) \in \tilde{\mathcal{D}}^t\}$  as all the stored exemplars of the old classes, all the observable dataset, all the available images and labels at task  $t$ , respectively.

### A.2 Training Strategy of RKD Method.

Most previous works [1, 2, 3, 4] of RKD methods have the common process that uses all the available data to train the new model by minimizing two losses: the classification cross-entropy (CE) loss and the knowledge distillation (KD) loss. The CE loss is used to learn new classes and The KD loss is used to encourage the new network  $f_{\theta, W}^t$  to mimic the output of the previous task model  $f_{\theta, W}^{t-1}$ . The CE loss ( $L_{CE}$ ) and the KD loss ( $L_{kd}$ ) are typically computed as follows:

$$L_{CE} = \sum_{(x, y) \in \tilde{\mathcal{D}}^t} \sum_{i=1}^{m+n} -\delta_i(x) \log[\sigma_i(f_{\theta, W}^t(x))] \quad (1)$$

$$L_{kd} = \sum_{x \in \tilde{\mathcal{X}}^t} \sum_{i=1}^m -\sigma_i(f_{\theta, W}^{t-1}(x)) \log[\sigma_i(f_{\theta, W}^t(x))]. \quad (2)$$

where  $\delta_i(x)$  is the label indicator function,  $m, n$  are the number of learned and new classes respectively and  $\sigma$  is either the *softmax* or *sigmoid* function. So the new model  $f_{\theta, W}^t$  are trained by the overall loss:

$$L = L_{kd} + \lambda L_{CE} \quad (3)$$

where  $\lambda$  is the hyper parameter. Note that  $f_{\theta, W}^t$  is continually updated at task  $t$ , whereas the network  $f_{\theta, W}^{t-1}$  is frozen and will not be stored after the completion of task  $t$ .

However, the dataset of the new classes ( $\mathcal{D}^t$ ) in the new task are out-of distribution (OOD) with the original training data ( $\tilde{\mathcal{D}}^{t-1}$ ) of the old model  $f_{\theta, W}^{t-1}$ , so the performances of KD suffer from huge degradation. Moreover, RKD methods suffer from the task-recency bias [5]. After training the new model, to tackle the task-recency bias, various RKD methods have different subsequent processing. For example, iCaRL [1] takes the nearest-mean-of-exemplars (NME) classification strategy to make inference, BiC [3] trains a bias-correction layer with a balanced dataset and EEIL [2] further fine-tunes the whole model by using the balanced dataset of stored exemplars.

## B EDBL Algorithm

The training process of our method (EDBL) is shown in **Algorithm 1**. At each incremental learning task, we first make data augmentation by re-sampling Mixup, then we train the new model with the mixed data in the same way as in the basic RKD method. At last, we fine-tunes the whole model by Eq. 16 in the balancing training phase.

---

**Algorithm 1** EDBL Algorithm for CIL

---

**Input:** Exemplars ( $\tilde{E}^t, t > 1$ ) and data of new classes ( $D^t$ ),  $f^{t-1}$ .  
**Output:** Exemplars  $\tilde{E}^{t+1} = \tilde{E}^t \cup E^t$ , The New Model  $f^t$   
**Mixup with Re-sampling:**  
Employ Mixup and Re-sample old classes to generate interpolated dataset  $\hat{D}$ .  
**Phase 1: MKD Training**  
**for**  $i = 1$  **to**  $T_1$  **do**  
    sample a mini-batch  $\hat{D}_m$  from  $\hat{D}$   
     $L_{ce} \leftarrow \text{Eq. 2}, L_{kd} \leftarrow \text{Eq. 3},$   
     $L(\Theta) = \frac{1}{m} \sum_{(\hat{x}, \hat{y}) \in \hat{D}_m} L_{ce}(\hat{x}, \hat{y}, \Theta) + \gamma_1 L_{kd}(\hat{x}, \hat{y}, \Theta)$   
    Update  $\Theta^{t+1} = \Theta^t - \eta_1 \nabla L(\Theta)$   
**end for**  
**Phase 2: Balancing Training**  
**for**  $i = 1$  **to**  $T_2$  **do**  
    sample a mini-batch  $\hat{D}_m$  from  $\hat{D}$   
     $\mathcal{ITB}(\hat{x}, \hat{y}, \Theta) \leftarrow \text{Eq. 15}$   
     $L_{overall}(\Theta) = \frac{1}{m} \sum_{(\hat{x}, \hat{y}) \in \hat{D}_m} \lambda_k \frac{L_{ce}(\hat{x}, \hat{y}, \Theta)}{\mathcal{ITB}(\hat{x}, \hat{y}, \Theta)} + \gamma_2 L_{kd}(\hat{x}, \hat{y}, \Theta), L_{ce}, L_{kd}$  is computed by Eq.2 and 3  
    Update  $\Theta^{t+1} = \Theta^t - \eta_2 \nabla L_{overall}(\Theta)$   
**end for**  
**Exemplar Management:** Utilize the strategy in [1] to make exemplar management to select  $E^t$  (maybe also remove some samples from  $\tilde{E}^t$ ) to generate  $\tilde{E}^{t+1}$ .

---

## C Implement Detail

### C.1 Typical Training Hyper-parameters Selection

We draw  $\lambda$  in Eq. 1 randomly from the Beta function  $B = (1, 1)$  for all the experiments. In re-sampling Mixup, we heuristically make sure the number of samples from old classes in a batch isn't less than 32. We semi-heuristically set the typical training hyper-parameters, e.g. epoch, learning rate, batch-size, etc. and tune a few of parameters on CIFAR-100 and Tiny-Imagenet experiments with 5 incremental learning phases, then we use the same setting of these parameters for other experiments on CIFAR-10/100 and Tiny-Imagenet, respectively. All experiments use the same batch size, weight decay, momentum: 128, 0.0002, 0.9, respectively. Other training details of the two stages are as below:

**MKD Training.** In Mixup-based Knowledge distillation (MKD) We train the new model with different hyper parameters on different datasets. For CIFAR-10/100, we train the network for 150 epochs at each task. The learning rate is set to 0.1, and reduced by a factor of 10 at 60, 100, 130 epochs. As for Tiny-Imagenet, the number of training epochs is 250 at each task. The learning rate is set to 0.1, and reduced by a factor of 10 at epochs 75, 125, 175 and 225.

**Balancing Training.** For CIFAR-10/100, the training epoch is 100, the learning rate is set to 0.01 and reduced by a factor of 10 at 30, 60, 80 epochs. For Tiny-Imagenet, the number of training epochs is 150 for each task. The learning rate is set to 0.01, and reduced by a factor of 10 at epochs 60, 100 and 130.

### C.2 Tuning on $\lambda_k$ and $\alpha$

We mainly make tuning on  $\lambda_k$  in Eq. 14 and  $\alpha$  in Eq. 16.  $\lambda_k$  origins from the IB method and it is given by  $\lambda_k = \gamma n_k^{-1} / \sum_{i=1}^K n_i^{-1}$ , where  $k$  is the label,  $n_i$  is the number of samples in the  $k$ -th class and  $\gamma$  is the hyper-parameter. We tune  $\gamma$  and  $\alpha$  by grid searching and adopt different values on different dataset and different experiments, which are given in Table 6.

Table 6

| Dataset       | Experiments         | $\gamma$ | $\alpha$ |
|---------------|---------------------|----------|----------|
| CIFAR-10      | Base-0-2 Phases     | 10       | 1e-6     |
|               | Base-0-5 Phases     | 100      | 5e-6     |
| CIFAR-100     | Base-0-2 Phases     | 100      | 5e-6     |
|               | Base-0-5 Phases     | 300      | 5e-6     |
|               | Base-0-10 Phases    | 100      | 5e-6     |
|               | Base-half-5 Phases  | 300      | 5e-6     |
|               | Base-half-10 Phases | 100      | 5e-6     |
|               | Base-half-15 Phases | 100      | 5e-6     |
| Tiny-Imagenet | Base-half-5 Phases  | 10       | 1e-6     |
|               | Base-half-10 Phases | 10       | 5e-6     |

## 69 D Comparison Results of Average Accuracy

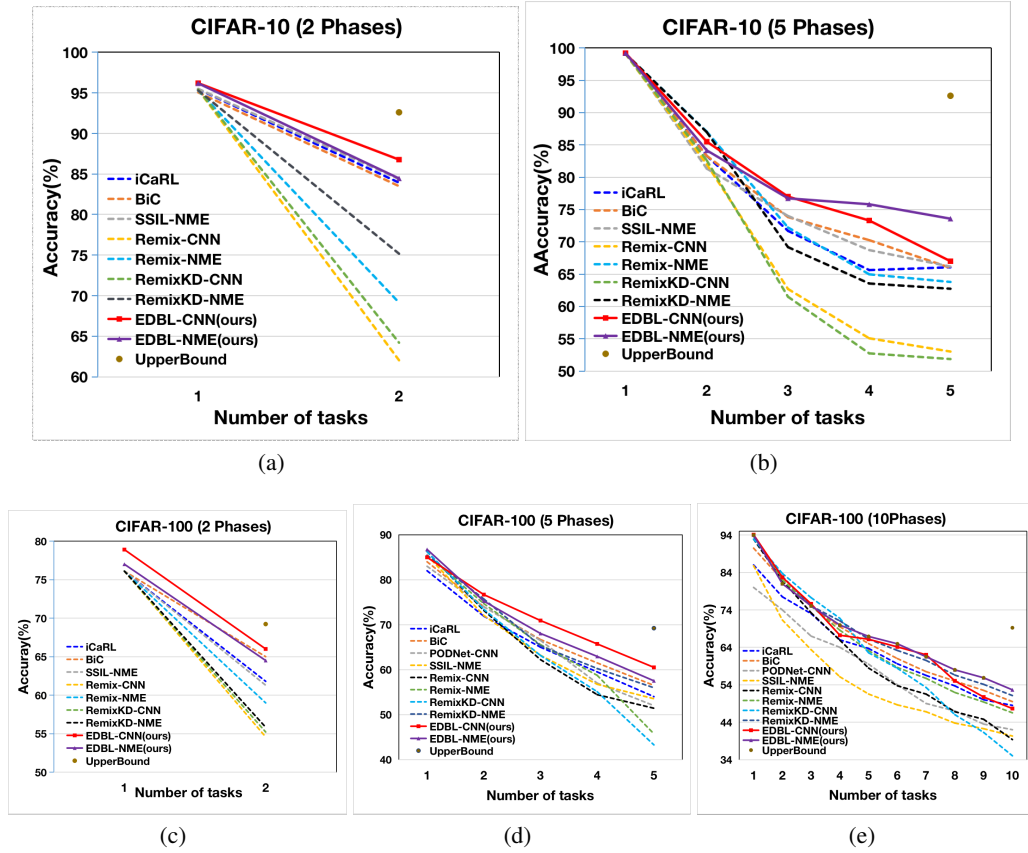

Figure 4: Comparison results of average accuracy of Base-0 experiments on CIFAR-10 with 2, 5 phases and CIFAR-100 with 2, 5, 10 pahses.

70 We conducted experiments on CIFAR-10/100 following Base-0 protocol to evaluate our method. The  
 71 memory budgets on CIFAR-10 and CIFAR-100 are fixed to 200 and 2000, respectively. CIFAR-10 is  
 72 split into 2 and 5 phases while CIFAR-100 is split into 2, 5 and 10 phases. Remix[6] adapted Mixup to  
 73 generate more effective interpolated data to tackle the long-tail learning. Our method employs Mixup  
 74 technique, so we use Remix as a compared method and directly employ Remix to train the new model  
 75 to learn new classes incrementally with the optimal hyper-parameters given in [6]. In this supplement,  
 76 to compare Remix with our method fairly, we further combine Remix with knowledge distillation  
 77 (KD) to conduct experiments and report the results of CNN output and the nearest-mean-of-exemplar  
 78 strategy (NME) (denoted as RemixKD-CNN and RemixKD-NME, respectively).

79 The comparison of the results are shown in Fig. 4. From Fig. 4, we can find that our methods (EDBL-  
 80 CNN and EDBL-NME) outperform all the baselines nearly on every incremental task except EDBL-  
 81 CNN loses to some baselines at the experiment on CIFAR-100 with 10 phases. Especially, our  
 82 methods surpass Remix-CNN, Remix-NME and RemixKD-CNN, RemixKD-NME significantly by  
 83 large margins about [1.1%, 22%] at the last incremental phase. We re-conducted the experiment of  
 84 our methods on CIFAR-10 with 5 phases and we got better results, compared with the results given  
 85 in Table 2. The incremental average accuracies of EDBL-CNN and EDBL-NME on CIFAR-10 with  
 86 5 phases are 80.4% and 81.894%, respectively, which surpass all the baselines significantly.

## 87 References

- 88 [1] Sylvestre-Alvise Rebuffi, Alexander Kolesnikov, Georg Sperl, and Christoph H Lampert. icarl:  
 89 Incremental classifier and representation learning. In *Proceedings of the IEEE conference on*

- 90      *Computer Vision and Pattern Recognition*, pages 2001–2010, 2017.
- 91 [2] Francisco M Castro, Manuel J Marín-Jiménez, Nicolás Guil, Cordelia Schmid, and Karteek  
92 Alahari. End-to-end incremental learning. In *Proceedings of the European conference on*  
93 *computer vision (ECCV)*, pages 233–248, 2018.
- 94 [3] Yue Wu, Yinpeng Chen, Lijuan Wang, Yuancheng Ye, Zicheng Liu, Yandong Guo, and Yun Fu.  
95 Large scale incremental learning. In *Proceedings of the IEEE/CVF Conference on Computer*  
96 *Vision and Pattern Recognition*, pages 374–382, 2019.
- 97 [4] Hongjoon Ahn, Jihwan Kwak, Subin Lim, Hyeonsu Bang, Hyojun Kim, and Taesup Moon. Ss-il:  
98 Separated softmax for incremental learning. In *Proceedings of the IEEE/CVF International*  
99 *Conference on Computer Vision*, pages 844–853, 2021.
- 100 [5] Matthias Delange, Rahaf Aljundi, Marc Masana, Sarah Parisot, Xu Jia, Ales Leonardis, Greg  
101 Slabaugh, and Tinne Tuytelaars. A continual learning survey: Defying forgetting in classification  
102 tasks. *IEEE Transactions on Pattern Analysis and Machine Intelligence*, 2021.
- 103 [6] Hsin-Ping Chou, Shih-Chieh Chang, Jia-Yu Pan, Wei Wei, and Da-Cheng Juan. Remix: rebal-  
104 anced mixup. In *European Conference on Computer Vision*, pages 95–110. Springer, 2020.
